# Supplementary material
Source: Research Square preprint supplement (doi:10.21203/rs.3.rs-9633499/v1)
Supplement: Supplementary file 1 [file 73d27033fdcfa432d4dc5b8e.docx]

**Supplementary material**

Supplementary Table 1 Mean elevation of the villages surrounding Uzungwa Scarp Nature Forest Reserve (USNFR).

| Village | Mean elevation (m.a.s.l.) |
| --- | --- |
| Ikule | 276 |
| Chita | 332 |
| Kidete | 342 |
| Udagaji | 656 |
| Itongoa | 668 |
| Uluti | 1035 |
| Itonya | 1435 |
| Uhafiwa | 1494 |
| Ukami | 1523 |
| Ihimbo | 1584 |
| Ilutila | 1677 |
| Kipanga | 1710 |
| Isanga | 1720 |
| Idegenda | 1817 |
| Mbawi | 1855 |
| Masisiswe | 1920 |


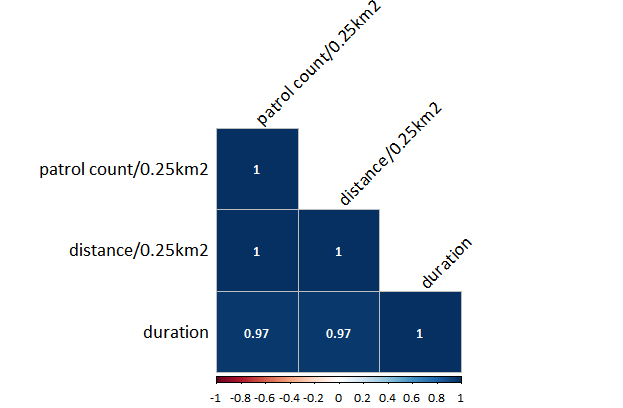


Supplementary Fig. 1 Correlation matrix of patrol effort metrics.

Supplementary Table 2 Patrol effort metrics and their values per year.

| Year | Patrol count / 0.25km2 | Distance (m) / 0.25km2 | Duration (hours) |
| --- | --- | --- | --- |
| 2018 | 659 | 316453.87 | 458.13 |
| 2019 | 768 | 374896.56 | 446.72 |
| 2020 | 642 | 291246.01 | 305.02 |
| 2021 | 1379 | 783415.09 | 708.67 |
| 2022 | 1494 | 857500.40 | 723.27 |
| 2023 | 1572 | 891849.09 | 832.41 |
| *Total* | 6514 | 3515361.02 | 3474.22 |

Supplementary Table 3 Topographic and anthropogenic covariates and their minimum, maximum, median and mean values.

|  | Elevation (m) | Distance to main trail (m) | Distance to border (m) | Slope (degrees) |
| --- | --- | --- | --- | --- |
| min | 290.0 | 1.9 | 0.5 | 0.11 |
| median | 1610.0 | 950.8 | 1347.5 | 12.13 |
| mean | 1385.6 | 1381.1 | 1598.2 | 13.70 |
| max | 2131.0 | 6837.4 | 5373.8 | 50.29 |

**
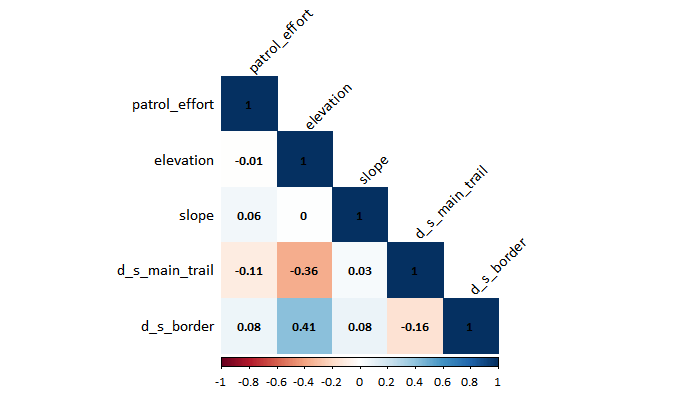
**

Supplementary Fig. 2 Correlation matrix for covariates tested.

Supplementary Table 4 Annual numbers of records for each type of illegal activity.

| Illegal activity | 2018 | 2019 | 2020 | 2021 | 2022 | 2023 | Total |
| --- | --- | --- | --- | --- | --- | --- | --- |
| **Wildlife poaching** | | | | | |  |  |
| Poacher | 28 | 14 | 2 | 6 | 0 | 2 | 52 |
| Poacher escape | 11 | 2 | 0 | 0 | 0 | 0 | 13 |
| Poachers' camp | 10 | 12 | 8 | 23 | 10 | 17 | 80 |
| Poachers' trail | 3 | 4 | 3 | 1 | 0 | 0 | 11 |
| Snare | 220 | 227 | 121 | 473 | 331 | 584 | 1956 |
| **Habitat destruction** | | | | | |  |  |
| Beehive | 2 | 7 | 3 | 21 | 0 | 0 | 33 |
| Burnt area | 1 | 0 | 0 | 1 | 0 | 0 | 2 |
| Firewood | 6 | 0 | 0 | 0 | 0 | 0 | 6 |
| Litter | 2 | 1 | 0 | 0 | 0 | 0 | 3 |
| Mining site | 0 | 0 | 1 | 1 | 0 | 0 | 2 |
| New charcoal kiln | 14 | 5 | 2 | 0 | 1 | 1 | 23 |
| New farm | 10 | 0 | 0 | 3 | 0 | 1 | 14 |
| New sawing site | 54 | 13 | 6 | 11 | 3 | 14 | 101 |
| New tree cut | 74 | 11 | 5 | 12 | 14 | 17 | 133 |
| Old charcoal kiln | 1 | 0 | 2 | 1 | 0 | 0 | 4 |
| Old farm site | 2 | 0 | 0 | 0 | 0 | 0 | 2 |
| Old sawing site | 2 | 2 | 3 | 8 | 0 | 0 | 15 |
| Old tree cut | 23 | 2 | 5 | 1 | 1 | 0 | 32 |
| Trench | 5 | 0 | 0 | 0 | 0 | 0 | 5 |
| *Total illegal signs* | 468 | 300 | 161 | 562 | 360 | 636 | 2487 |


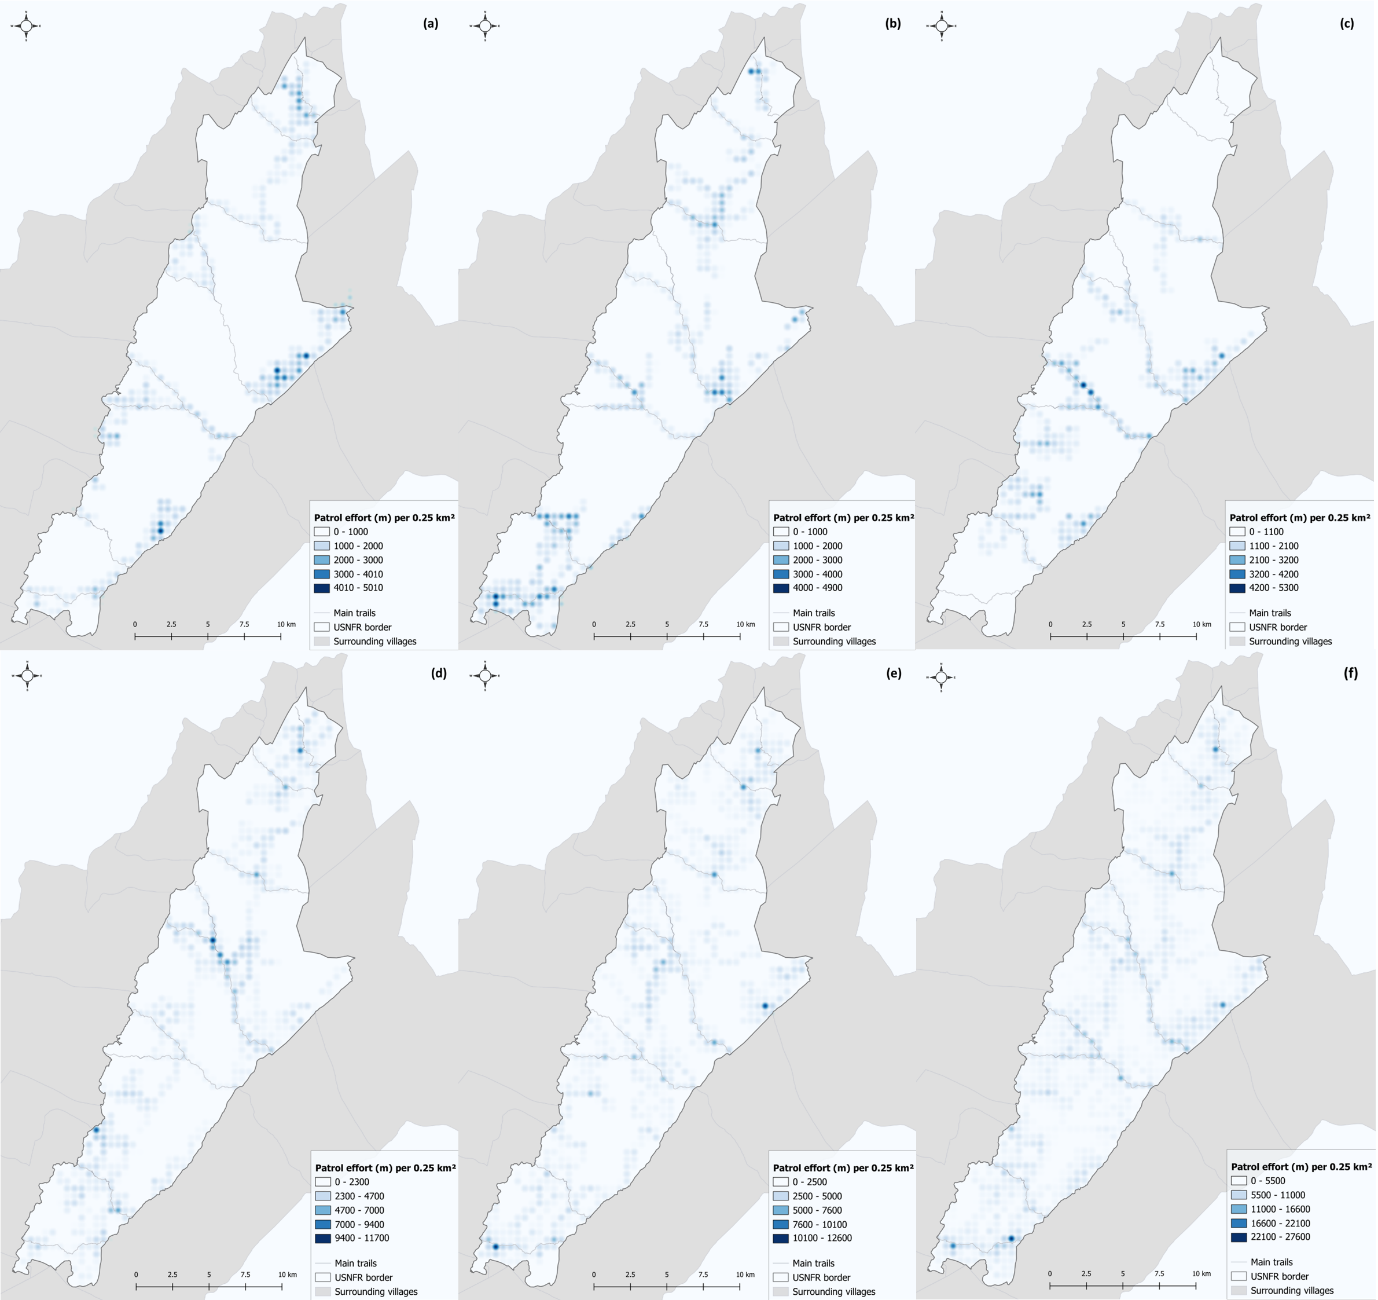


Supplementary Fig. 4 Heatmaps of patrol effort in (a) 2018, (b) 2019, (c) 2020, (d) 2021, (e) 2022 and (f) 2023.


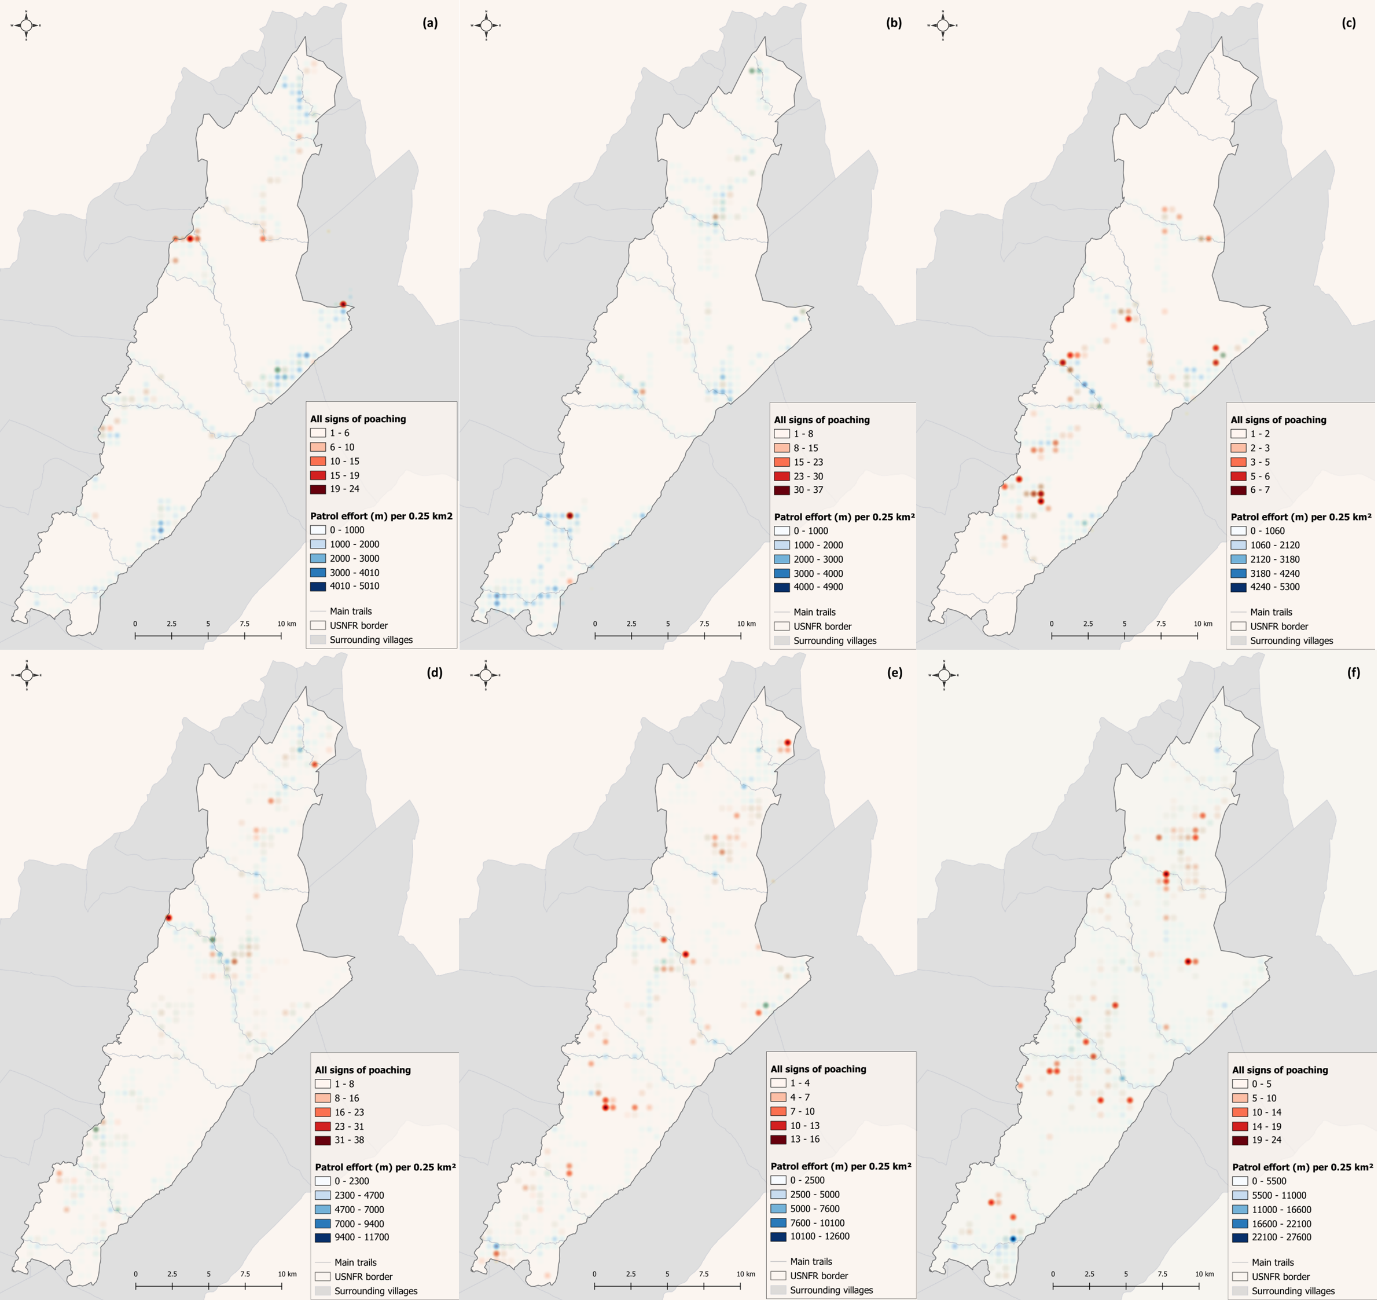


Supplementary Fig. 5 Heatmaps of all signs of poaching detected in (a) 2018, (b) 2019, (c) 2020, (d) 2021, (e) 2022 and (f) 2023.


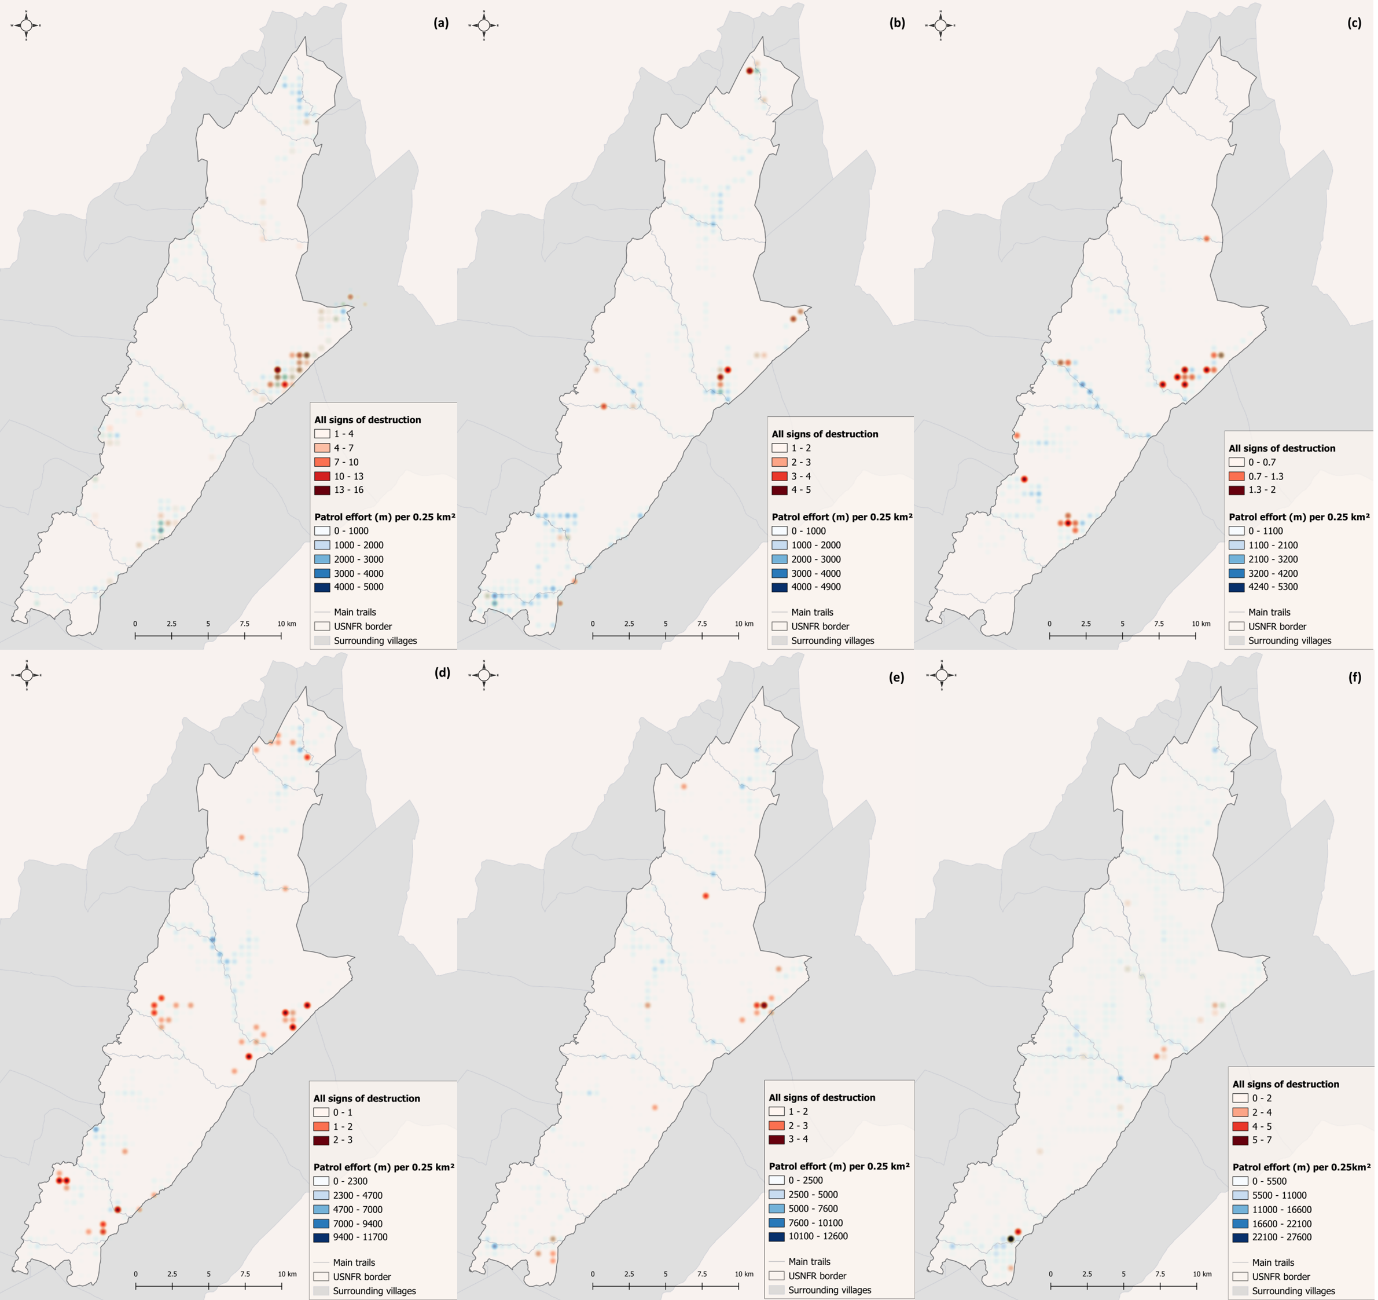


Supplementary Fig. 6 Heatmaps of all signs of habitat destruction detected in (a) 2018, (b) 2019, (c) 2020, (d) 2021, (e) 2022 and (f) 2023.
